# Supplementary material
Source: ML conference proceedings conference paper supplement (https://openaccess.thecvf.com/content/CVPR2025/html/Yariv_Through-The-Mask_Mask-based_Motion_CVPR_2025_paper.html)
Supplement: Supplementary file 2 [file Yariv_Through-The-Mask_Mask-based_Motion_CVPR_2025_supplemental.zip]

## Data Pre-processing

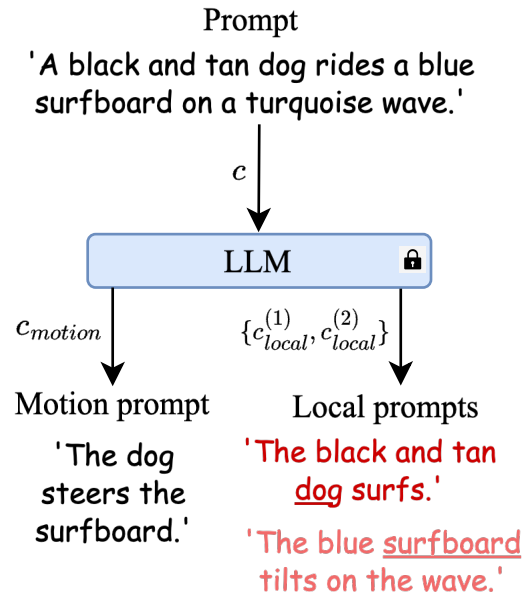

$[\epsilon; s^{(0)}; x^{(0)}]$

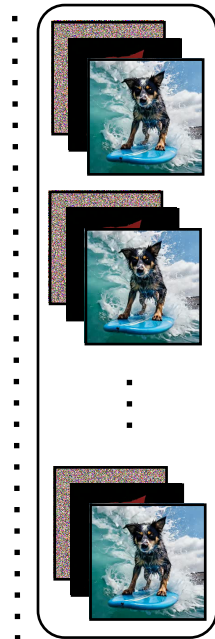

## Image-to-Motion

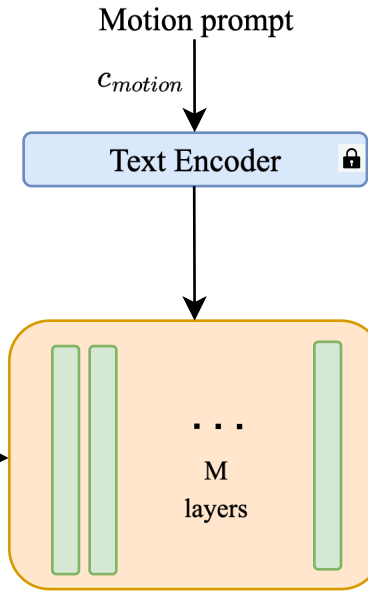

$\hat{s}$

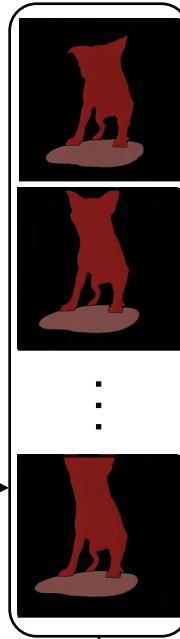

$[\epsilon; x^{(0)}]$

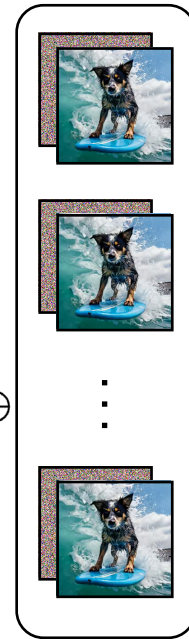

## Motion-to-Video

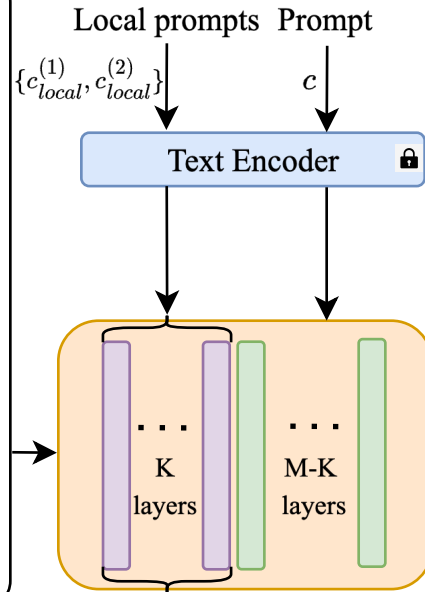

$\hat{x}$

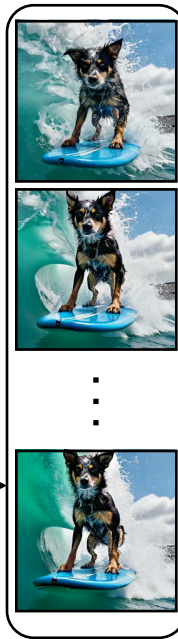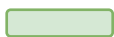

Attention block

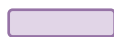

Masked Attention block
