# Supplementary material
Source: ML conference proceedings conference paper supplement (https://openaccess.thecvf.com/content/CVPR2025/html/Yariv_Through-The-Mask_Mask-based_Motion_CVPR_2025_paper.html)

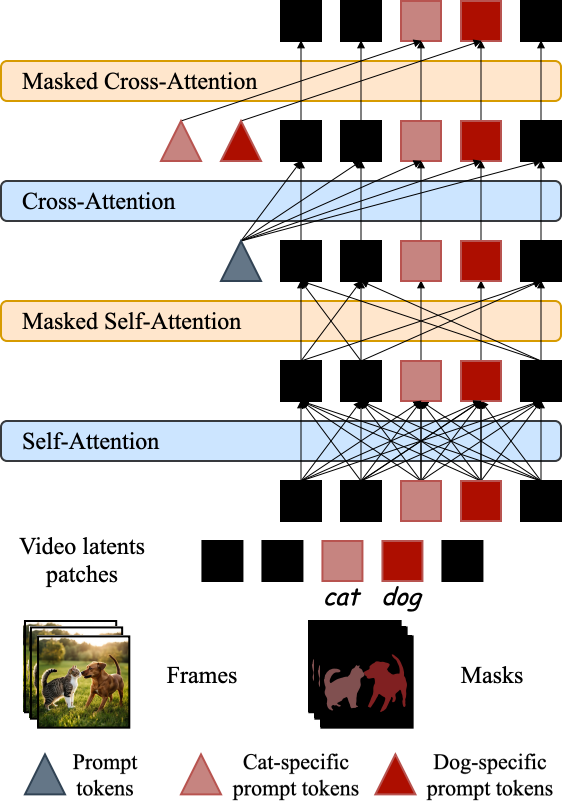

Supplement: Supplementary file 1 [file Yariv_Through-The-Mask_Mask-based_Motion_CVPR_2025_supplemental.zip]
